# Supplementary material for: Parameterization of 3D cloud geometry and a neural-network-based fast forward operator for polarized radiative transfer
Source: Copernicus journal article supplement (doi:10.5194/amt-18-5805-2025), 2025-10-27
Supplement: Supplementary file [file amt-18-5805-2025-supplement-title-page.pdf › amt-18-5805-2025-supplement-title-page.pdf]

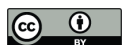

*Supplement of*

## **Parameterization of 3D cloud geometry and a neural-network-based fast forward operator for polarized radiative transfer**

**Anna Weber et al.**

*Correspondence to:* Anna Weber ([weber.ann@physik.uni-muenchen.de](mailto:weber.ann@physik.uni-muenchen.de))

- [amt-18-5805-2025-supplement-title-page.pdf](#)
- [namelist.input](#)

The copyright of individual parts of the supplement might differ from the article licence.
